# Supplementary material for: Maresin 1 repletion improves muscle regeneration after volumetric muscle loss
Source: eLife journal article supplement (doi:10.7554/elife.86437), 2023-12-22
Supplement: supp [file elife_poa_e86437_Figure_1_figure_supplement_1.pdf › elife_poa_e86437_Figure_1_figure_supplement_1.pdf]

**A**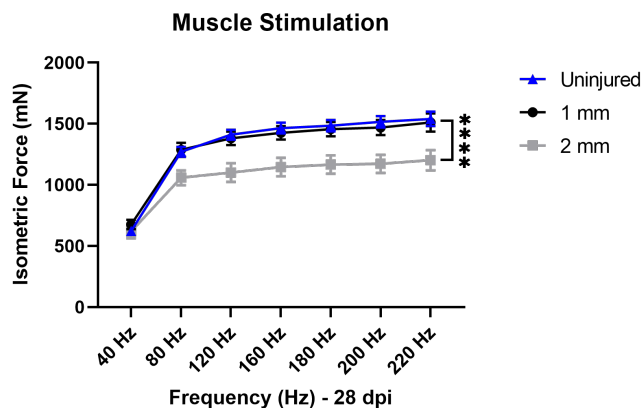**B**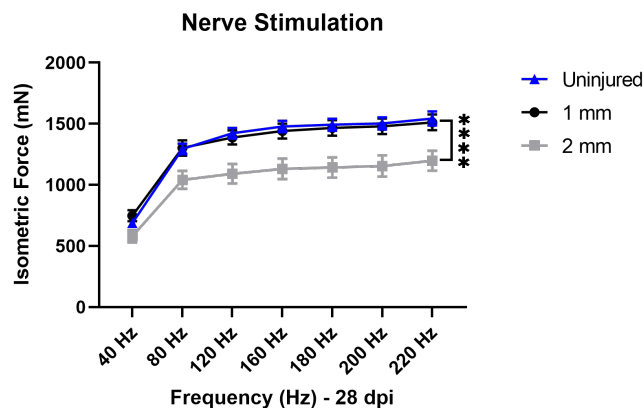**C**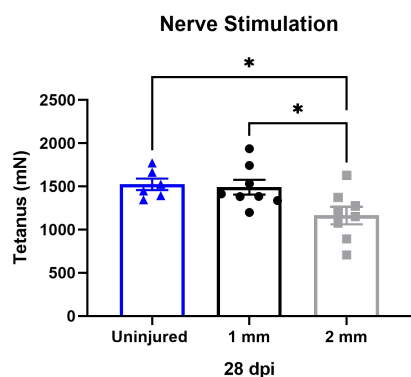**D**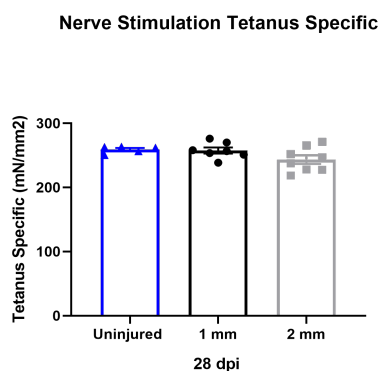**E**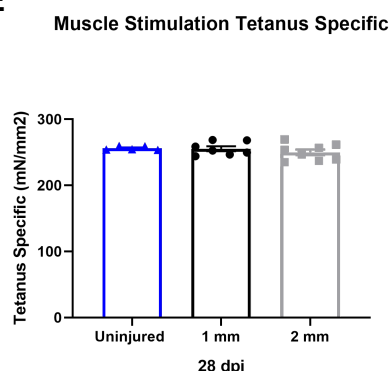

**Figure 1 – Figure Supplement 1. Functional assessment of response to healing or degenerative volumetric muscle loss injuries. A-B)** Force frequency of muscle (**A**) and nerve stimulation (**B**) of uninjured, 1mm and 2 mm groups uninjured (blue) tibialis anterior muscle at 28 dpi (1mm (black) or 2mm (gray)). Points show mean  $\pm$  SEM and \*\*\*\*p<0.0001 between uninjured and 2 mm injury groups by two-way ANOVA and post-hoc. n=6-8 tissues from 6-8 mice per group. **C)** Average tetanic force from nerve stimulation of uninjured tibialis anterior muscle at 28 dpi. Bars show mean  $\pm$  SEM and \*p<0.05 between injury types by two-way ANOVA and post-hoc. n=6-8 tissues from 6-8 mice per group. **D-E)** Tetanic force normalized to total muscle CSA (mm<sup>2</sup>) from nerve (**D**) and muscle (**E**) stimulation of uninjured tibialis anterior muscle at 28 dpi. Bars show mean  $\pm$  SEM. n=6-8 tissues from 6-8 mice per group.
