# Supplementary material for: Maresin 1 repletion improves muscle regeneration after volumetric muscle loss
Source: eLife journal article supplement (doi:10.7554/elife.86437), 2023-12-22
Supplement: supp [file elife_poa_e86437_Figure_3_figure_supplement_1.pdf › elife_poa_e86437_Figure_3_figure_supplement_1.pdf]

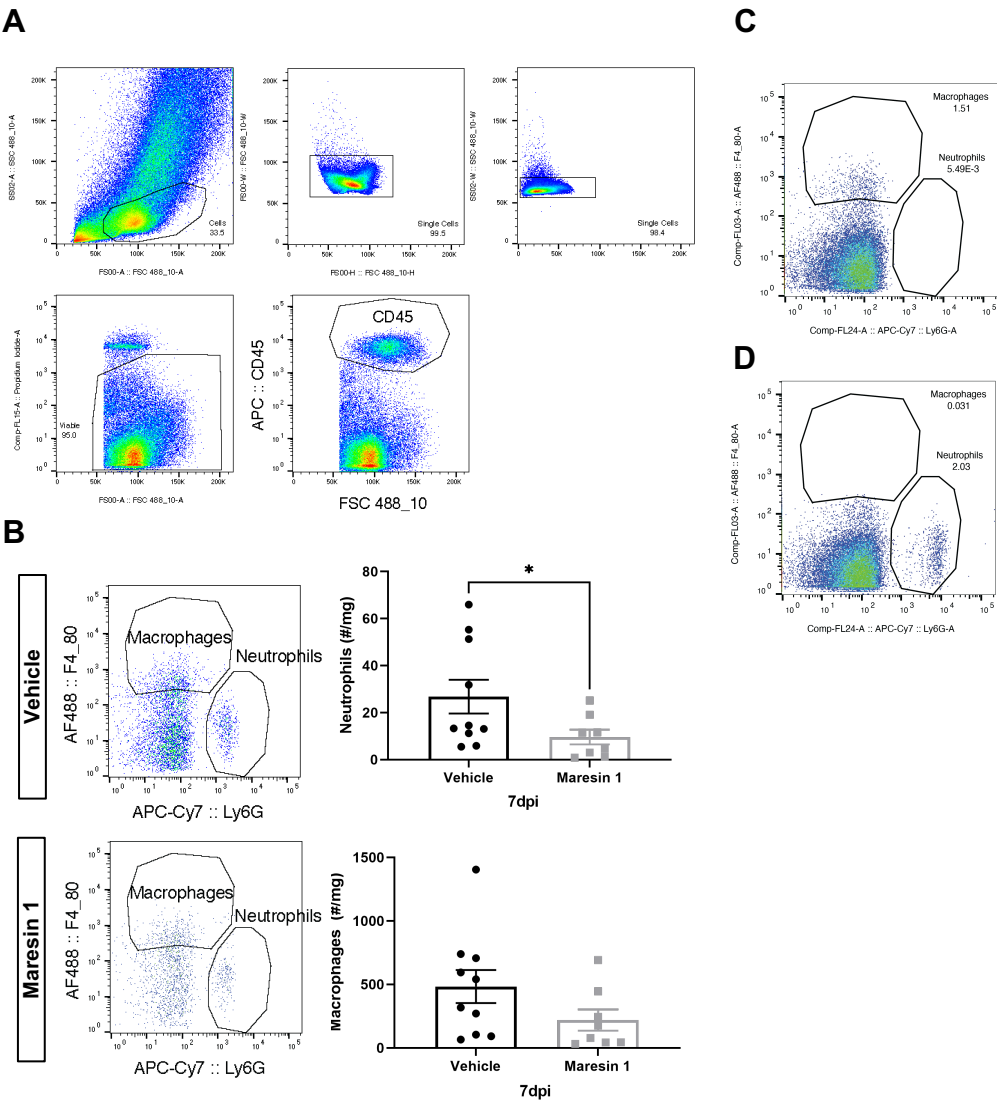

**Figure 3 – Figure Supplement 1. Immune profiling of response to VML injury after treatment with Maresin 1. A)** Complete gating strategy for neutrophils and macrophages. Values indicate percentage of parent. **B)** Maresin 1 treatment significantly reduced neutrophil abundance and reduced F4/80+ macrophage abundance by flow cytometry at 7 dpi. \* $p < 0.05$  by two-sided, two-sample t-test.  $n = 8-10$  tissues from 4-5 mice. **C)** FMO control for Ly6G-APC-Cy7. Values indicate percentage of CD45+ cells. **D)** FMO control for F4/80-AF488. Values indicate percentage of CD45+ cells.
