# Supplementary material for: Maresin 1 repletion improves muscle regeneration after volumetric muscle loss
Source: eLife journal article supplement (doi:10.7554/elife.86437), 2023-12-22
Supplement: supp [file elife_poa_e86437_Figure_3_figure_supplement_2.pdf › elife_poa_e86437_Figure_3_figure_supplement_2.pdf]

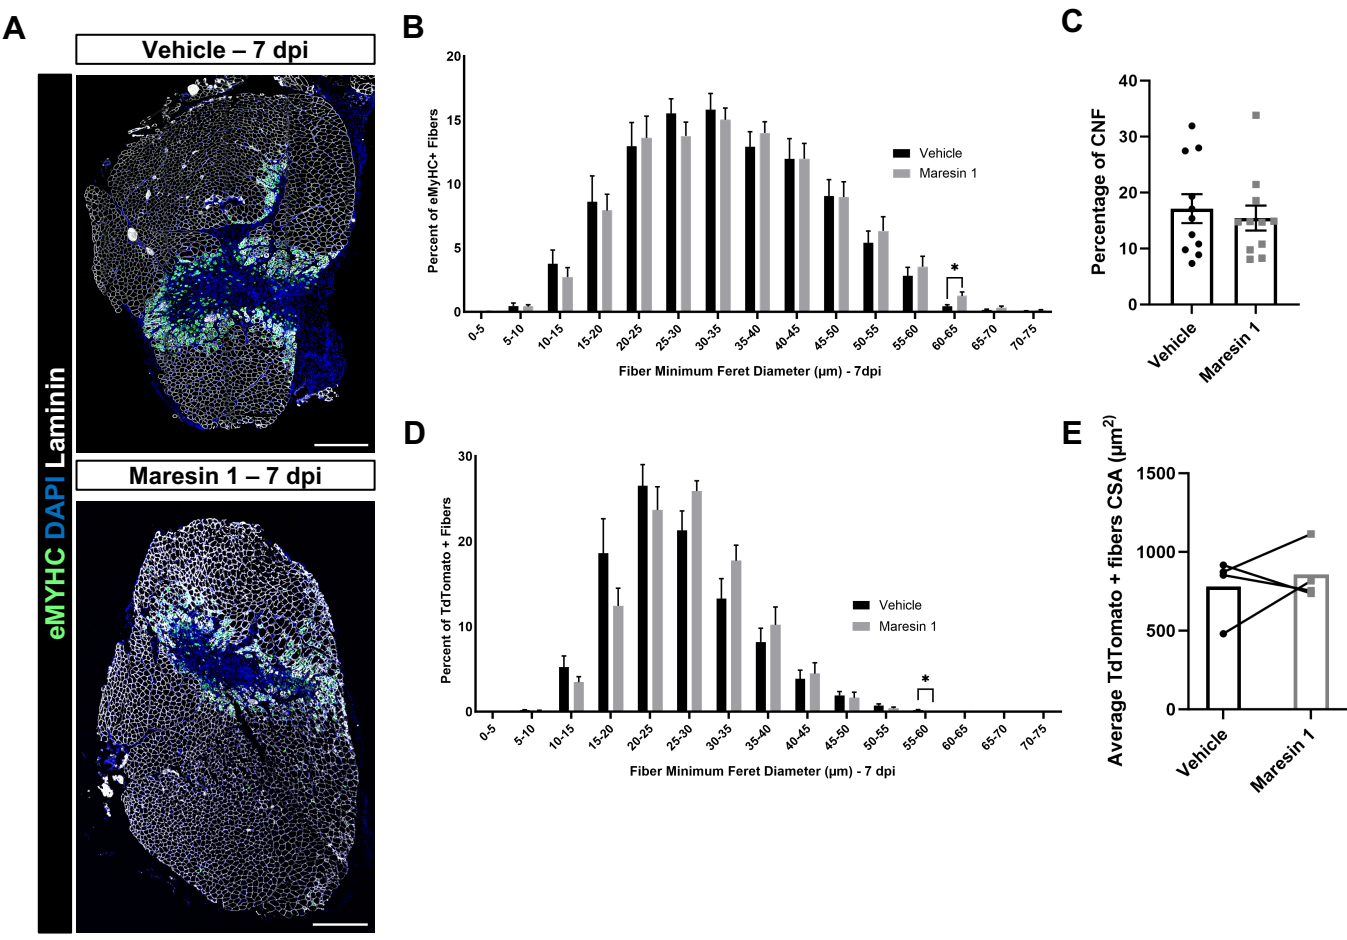

**Figure 3 – Figure Supplement 2. Regenerative response to VML injury after treatment with Maresin 1. A)** Representative cross-sections from muscles isolated 7 dpi with vehicle (top) or Maresin 1 (bottom) treatment. Sections are immunostained for embryonic myosin heavy chain or eMyHC (green), DAPI (blue) and laminin (white). Scale bar = 500 μm. **B)** Distributions of Feret diameter for eMyHC<sup>+</sup> myofibers shows increased number of larger regenerating myofibers for Maresin 1 treatment when compared to vehicle treatment at 7 dpi. Graphs show mean ± SEM, n=11 tissues from 11 mice per group. **C)** Percentage of centrally nucleated fibers at 7 dpi. n=11 tissues from 11 mice per group. **D)** Distributions of Feret diameter for TdTomato<sup>+</sup> myofibers shows increased number of larger regenerating myofibers for Maresin 1 treatment when compared to vehicle treatment at 7 dpi. Graphs show mean ± SEM, n=4 tissues from 4 mice per group. **E)** Percentage of TdTomato<sup>+</sup> positive fibers (n=4 tissues from 4 mice per group)
