# Supplementary material for: Maresin 1 repletion improves muscle regeneration after volumetric muscle loss
Source: eLife journal article supplement (doi:10.7554/elife.86437), 2023-12-22
Supplement: supp [file elife_poa_e86437_Figure_3_figure_supplement_3.pdf › elife_poa_e86437_Figure_3_figure_supplement_3.pdf]

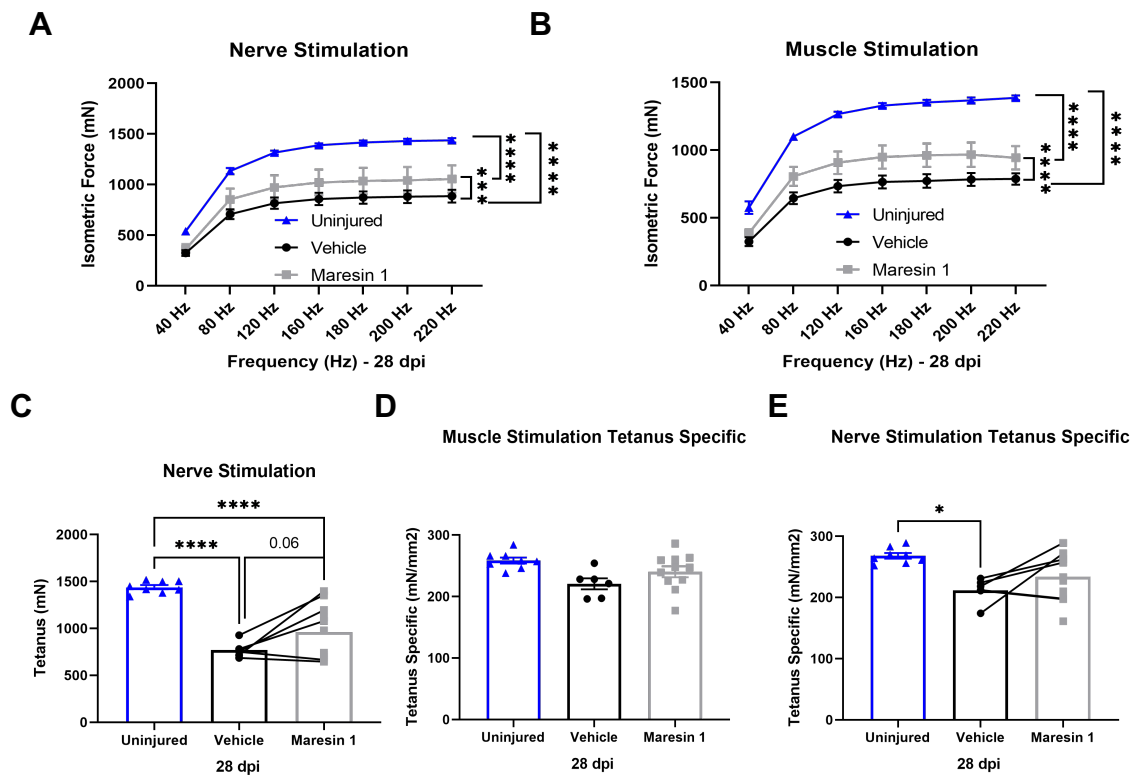

**Figure 3 – Figure Supplement 3. Changes in muscle force after VML injury are enacted with treatment with Maresin 1. A-B)** Force frequency of nerve **A)** and muscle stimulation **B)** of uninjured (blue) tibialis anterior muscle at 28 dpi following treatment with Saline (black) or Maresin 1 (gray). Points show mean  $\pm$  SEM and \*\*\*\* $p < 0.0001$  between uninjured and vehicle, uninjured and Maresin 1 treatment, and \*\*\* $p < 0.001$  between vehicle and Maresin 1 treatments **(A)** \*\*\*\* $p < 0.001$  between vehicle and Maresin 1 treatments **(B)** by two-way ANOVA and post-hoc analysis.  $n = 6-9$  tissues from 6-9 mice per group. **C)** Average tetanic force from nerve stimulation of uninjured tibialis anterior muscle at 28 dpi following 2mm volumetric muscle loss injuries treated with Saline and Maresin 1. Bars show mean  $\pm$  SEM and \*\*\*\* $p < 0.0001$  between uninjured and VML+Saline treatment and between uninjured and VML+Maresin 1 treatment, and  $p = 0.0690$  between VML+Maresin 1 and VML+Saline treatment by one-way ANOVA and post-hoc.  $n = 6-9$  tissues from 6-9 mice per group. **D-E)** Tetanic force normalized to total muscle CSA (mm<sup>2</sup>) from muscle **(D)** and nerve **(E)** stimulation of uninjured tibialis anterior muscle at 28 dpi following 2mm VML injuries treated with Saline and Maresin 1. Bars show mean  $\pm$  SEM and \* $p < 0.05$  between uninjured and VML+Saline treatment by one-way ANOVA and post-hoc analysis.  $n = 6-9$  tissues from 6-9 mice per group.
