# Supplementary material for: Maresin 1 repletion improves muscle regeneration after volumetric muscle loss
Source: eLife journal article supplement (doi:10.7554/elife.86437), 2023-12-22
Supplement: supp [file elife_poa_e86437_Figure_4_figure_supplement_1.pdf › elife_poa_e86437_Figure_4_figure_supplement_1.pdf]

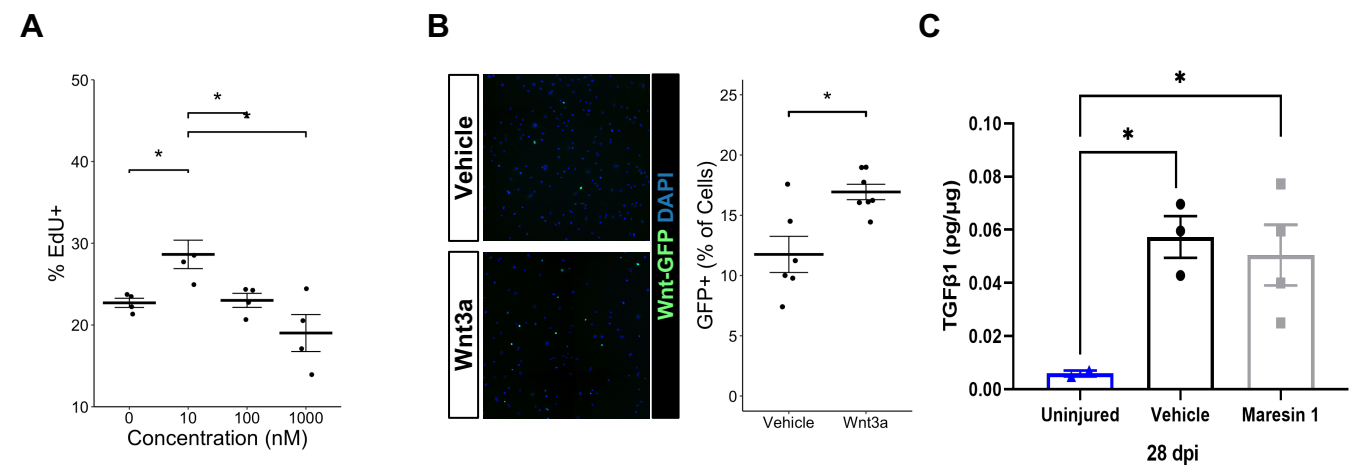

**Figure 4 – Figure Supplement 1. Experimental evaluation of parameters for Maresin-1 treatment of MuSCs and their progeny in vitro.** **A)** Maresin-1 dose response curve showed the most impact on proliferation with treatment using 10nM. There was no statistically significant effect with higher doses. \* $p < 0.05$  by one-way ANOVA with post-hoc analysis.  $n = 4$  wells per condition, each reflecting the combined analysis of 10 images. **B)** MuSCs isolated from P7Wnt mice demonstrate increased percentage of GFP+ cells in response to treatment with recombinant Wnt3a protein. \* $p < 0.05$  by two-sided, two-sample t-test.  $n = 8$  wells per condition. **C)** ELISA assay targeting TGFβ1 in VML injured TAs muscles. Maresin 1 and vehicle treatments were administered every 2 days throughout 7 dpi. Points show mean ± SEM and \* $p < 0.05$  between uninjured and vehicle, uninjured and Maresin 1 treatments by one-way ANOVA and post-hoc.  $n = 3-4$  tissues from 2 mice per group.
