# Supplementary material for: Maresin 1 repletion improves muscle regeneration after volumetric muscle loss
Source: eLife journal article supplement (doi:10.7554/elife.86437), 2023-12-22
Supplement: supp [file elife_poa_e86437_Figure_5_figure_supplement_1.pdf › elife_poa_e86437_Figure_5_figure_supplement_1.pdf]

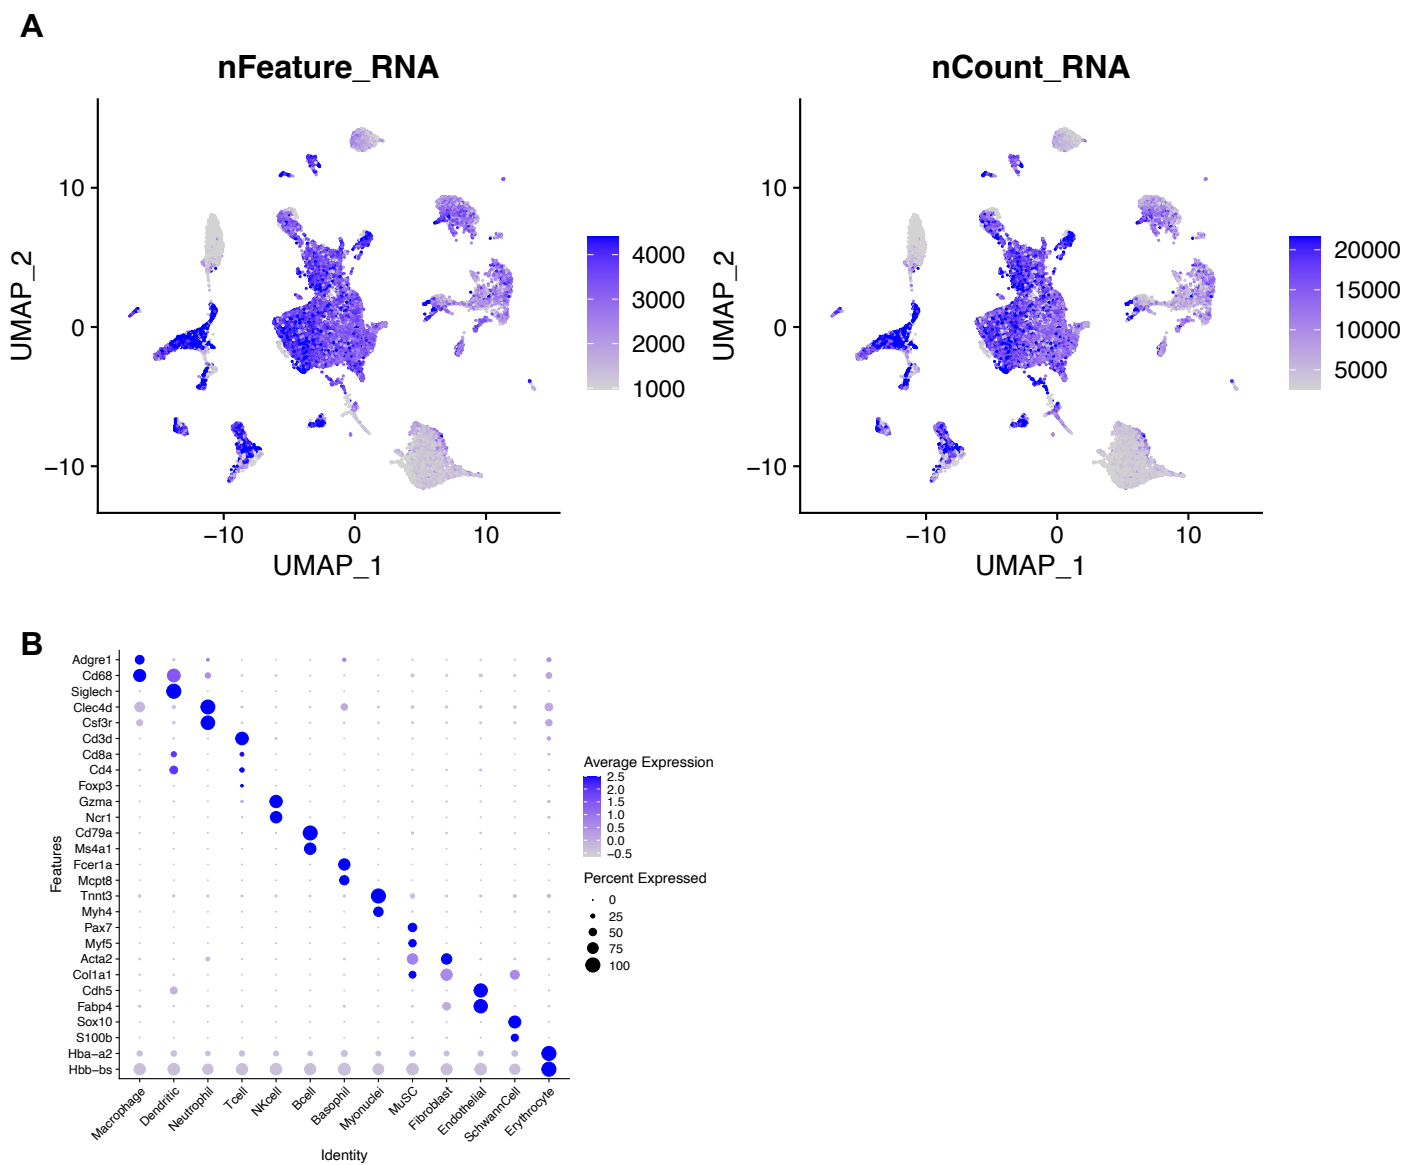

**Figure 5 – Figure Supplement 1. Quality control metrics for single cell sequencing after VML injury and treatment with Maresin 1. A)** UMAP plots colored by the number of genes per cell (left) and the number of unique molecular identifiers per cell (right). **B)** Dot plot of known marker gene expression for each cell type.
