# Supplementary material for: Maresin 1 repletion improves muscle regeneration after volumetric muscle loss
Source: eLife. 2023 Dec 22;12:e86437. doi: 10.7554/eLife.86437 (PMC10807862; doi:10.7554/eLife.86437)
Supplement: Supplementary file 1. [file elife-86437-supp1.xlsx]

## Sheet: Sheet1
Supplementary Table 1: Metabolite concentration (pmol/g) for different pathways in uninjured, 1 mm VML, and 2 mm (TA) tissue homogenates.
					3 days						7 days						14 days
Pathway	Analytes	Uninjured			1 mm			2 mm			1 mm			2 mm			1 mm			2 mm
Cyclooxygenase	PGE1	ND			2.49197	±	0.36384	3.56391	±	0.433393	2.83236	±	1.31381	1.9719	±	0.773613	0.953444	±	0.503735	ND
	PGF1a	0.535076	±	0.180779	0.938721	±	0.118269	0.839611	±	0.292882	1.08503	±	0.126875	1.06419	±	0.076653	0.732907	±	0.0851642	1.15103	±	0.0860889
	15-keto PGE1	ND			ND			ND			ND			ND			ND			ND
	13,14dhPGE1	ND			ND			ND			ND			ND			ND			ND
	13,14dh-15k-PGE1	ND			0.214298	±	0.088746	0.432757	±	0.158348	0.497531	±	0.0839068	0.378132	±	0.130879	0.209127	±	0.0890983	ND
	D17-PGE1	ND			ND			ND			ND			ND			ND			ND
	Bicyclo PGE1	ND			ND			0.489826	±	0.167917	ND			ND			ND			ND
	6-keto PGE1	ND			ND			ND			ND			ND			ND			ND
	2,3-dinor PGE1	ND			ND			ND			ND			ND			ND			ND
	19(R)-hydroxy PGE1	ND			ND			ND			ND			ND			ND			ND
	15(R)-PGE1	ND			ND			1.65269	±	0.265267	ND			ND			ND			ND
	TXB2	14.5387	±	2.91935	21.953	±	1.60666	23.558	±	8.67999	27.843	±	4.96459	19.9788	±	1.62409	13.3853	±	1.81959	20.0871	±	1.97062
	12(S)-HHTrE	82.2586	±	6.31651	217.092	±	14.6197	350.798	±	23.9393	291.264	±	48.2677	338.102	±	16.165	189.903	±	18.0392	334.124	±	41.5575
	PGD2	15.8741	±	1.52143	40.277	±	3.93245	50.0902	±	7.24472	88.5297	±	20.1322	77.3525	±	16.3277	39.1038	±	7.79746	64.0236	±	10.1222
	PGE2	62.9472	±	5.95972	162.739	±	14.0112	257.613	±	53.5719	213.092	±	40.9119	193.744	±	37.7706	100.082	±	14.0789	148.174	±	12.3208
	PGF2a	17.7436	±	0.914807	26.4653	±	2.65335	31.6344	±	3.3412	36.2628	±	3.86664	36.0064	±	1.64413	24.6623	±	1.75278	37.5246	±	2.64814
	6kPGF1a	16.2021	±	3.04206	26.4151	±	2.52216	41.1344	±	4.37605	47.2126	±	8.37455	41.9663	±	3.30893	16.9557	±	3.67245	26.5572	±	3.10885
	PGJ2	2.17394	±	0.453536	4.28701	±	0.407516	6.6399	±	0.793945	9.44214	±	1.78422	7.79094	±	1.18236	4.7088	±	0.862526	9.29729	±	1.39674
	PGA2	2.58584	±	0.573045	5.96192	±	0.480145	10.1377	±	1.38259	12.2754	±	2.25123	9.7934	±	1.6204	6.14668	±	1.4069	11.9499	±	1.93756
	15-keto PGE2	4.20777	±	0.413594	4.06462	±	0.503655	4.75541	±	0.786642	7.56088	±	1.03117	7.36487	±	1.37613	6.11562	±	0.680623	8.44748	±	0.534354
	15-keto PGF2a	4.87581	±	0.310888	9.89121	±	0.683537	13.9742	±	2.37693	12.8348	±	2.29675	10.9663	±	2.15831	7.49306	±	0.93359	9.90569	±	1.02791
	13,14dh-15k-PGE2	3.26449	±	0.233447	12.9436	±	1.26453	16.1891	±	1.66753	11.2538	±	2.05248	10.9511	±	1.93441	5.3077	±	0.706315	6.79748	±	0.698089
	13,14dh-15k-PGD2	5.7308	±	0.769661	7.18683	±	0.592957	10.0592	±	0.800203	11.488	±	2.41537	8.27453	±	1.33568	4.5065	±	0.98848	7.6006	±	0.676319
	19(R)-OH PGF2a & 20-OH PGF2a	ND			ND			ND			ND			ND			ND			ND
	8-isoPGF2a & 11bPGF2a	0.629944	±	0.213506	1.36589	±	0.157586	1.88665	±	0.258854	1.33184	±	0.531493	2.33648	±	0.0948818	1.53917	±	0.253293	1.50595	±	0.50259
	11dh-2,3-dinor TXB2	0.322661	±	0.117694	0.433705	±	0.11355	0.179732	±	0.0604561	ND	±	ND	ND	±	ND	ND	±	ND	ND	±	ND
	D12-PGJ2	1.0896	±	0.195831	2.89577	±	0.29872	3.259	±	0.428461	5.50813	±	1.09742	4.27073	±	0.744761	2.0969	±	0.385363	4.26857	±	0.646119
	tetranor PGEM	ND			0.132611	±	0.0597318	ND			ND			ND			ND			ND
	15d-D12,14-PGJ2	ND			ND			ND			ND			ND			ND			ND
	Bicyclo PGE2	ND			0.953373	±	0.436989	ND			0.624513	±	0.223769	ND			ND			ND
	19(R)-OH PGE2 & 20-OH PGE2	ND			ND			ND			ND			ND			ND			ND
	2,3-dinor TXB2	ND			0.685567	±	0.299423	1.77856	±	0.288181	ND			1.07927	±	0.115007	0.952389	±	0.389003	1.44167	±	0.493783
	11dh-TXB2	ND			ND			ND			ND			ND			ND			ND
	13,14dh-15k-PGF2a	ND			ND			ND			ND			ND			ND			ND
	6,15-diketo PGFa	ND			ND			ND			ND			ND			ND			ND
	iPF-VI	ND			ND			ND			ND			ND			ND			ND
	TXB3	ND			0.475633	±	0.195142	1.33981	±	0.494586	ND	±	ND	ND	±	ND	ND	±	ND	ND	±	ND
	PGE3	2.30587	±	0.590913	2.50221	±	0.248714	3.74329	±	0.385793	3.3021	±	0.549565	2.78119	±	0.62726	1.53813	±	0.285391	1.8785	±	0.0577396
	PGF3a	ND			ND			ND			0.38678	±	0.0203336	ND			ND			ND
	PGD3	ND			ND			ND			ND			ND			ND			ND
	11dh TXB3	ND			ND			ND			ND			ND			ND			ND
	15d-D12,14-PGJ3	ND			ND			ND			ND			ND			ND			ND
	sum	237.286	±	24.7268	552.366	±	45.6586	835.75	±	112.195	784.627	±	142.296	776.173	±	89.0109	426.392	±	54.7299	694.735	±	79.7854
	Δ change	0	±	25.0129	315.08	±	44.9667	598.464	±	111.267	547.341	±	142.31	538.887	±	89.0548	189.106	±	22.0008	457.449	±	80.7776
5-LOX	9(S)-HOTrE	28.1371	±	2.40109	49.0458	±	4.66887	58.2914	±	8.02743	36.256	±	4.88308	41.6637	±	4.15301	54.6387	±	3.27343	73.3778	±	3.12131
	9-OxoOTrE	15.2982	±	1.53239	19.7358	±	0.978258	21.2162	±	0.898883	13.5844	±	2.59334	17.0249	±	1.90543	24.2398	±	1.9915	32.9643	±	2.29982
	5(S)-HETrE	0.641192	±	0.122483	1.6513	±	0.222119	2.00838	±	0.261049	1.54803	±	0.280345	1.97654	±	0.40163	1.42863	±	0.194471	3.36423	±	0.378728
	5-HETE	34.4403	±	4.51792	137.978	±	8.71195	199.184	±	16.3948	99.9147	±	20.073	133.85	±	16.5127	84.1844	±	8.84374	190.668	±	27.1944
	5-oxoETE	11.3913	±	1.20267	25.8937	±	2.49354	41.7741	±	7.39832	19.351	±	4.52387	33.5274	±	3.41023	26.2783	±	3.30471	58.234	±	13.777
	LTB4	1.24539	±	0.560459	1.42877	±	0.586858	4.63877	±	0.53314	ND			4.98347	±	0.577223	1.73993	±	0.758308	3.8035	±	1.8377
	12-OxoLTB4	ND			ND			ND			ND			ND			ND			ND
	5-HEPE	11.4591	±	1.4133	23.5689	±	2.39594	32.2094	±	4.99027	17.7284	±	3.15103	18.6149	±	0.962803	16.0523	±	1.3062	22.354	±	1.27134
	LTB5	ND			ND			ND			0.238811	±	0.0890375	ND			0.431602	±	0.127718	0.643312	±	0.236831
	4-HDoHE	35.2017	±	2.97505	85.0859	±	7.80265	99.6848	±	13.0184	42.0777	±	7.95242	66.588	±	9.00668	61.8716	±	4.7663	114.966	±	10.9966
	7-HDoHE	2.53868	±	0.660292	9.25236	±	1.01855	12.6856	±	1.71541	4.45246	±	0.956431	7.21772	±	0.852462	5.12498	±	0.949135	9.49006	±	1.67771
	sum	140.353	±	15.3857	353.641	±	28.8787	471.693	±	53.2377	235.151	±	44.5026	325.447	±	37.7821	275.99	±	25.5155	509.865	±	62.7915
	Δ change	0	±	20.271	213.288	±	28.8787	331.34	±	294.133	94.7985	±	160.275	185.094	±	53.9387	135.637	±	25.3878	369.512	±	128.101
8-LOX	8-HETE	25.3469	±	6.86152	93.1409	±	19.2661	103.138	±	4.90467	77.1086	±	18.8637	71.6384	±	8.69812	45.5364	±	4.9553	73.584	±	4.24581
	8-HEPE	5.71081	±	0.479515	12.0606	±	2.03319	19.0869	±	1.97136	11.327	±	2.16079	13.8458	±	1.93055	11.5536	±	1.79446	13.3179	±	2.01041
	sum	31.0577	±	7.34103	105.202	±	21.2993	122.225	±	6.87603	88.4356	±	21.0245	85.4841	±	10.6287	57.09	±	6.74977	86.9018	±	6.25622
	Δ change	0	±	7.34103	74.1438	±	21.2993	91.1676	±	6.87603	57.3778	±	21.0245	54.4264	±	10.6287	26.0323	±	2.71077	55.8441	±	6.25622
12-LOX	9-HODE	196.003	±	25.9469	450.068	±	44.5724	532.591	±	76.7549	431.006	±	41.4475	443.332	±	15.9471	482.162	±	35.433	777.555	±	119.569
	9-OxoODE	318.897	±	24.5666	566.125	±	70.1995	570.834	±	89.679	441.906	±	46.7287	380.9	±	66.5668	613.509	±	103.839	612.107	±	70.1663
	8(S)-HETrE	4.73589	±	0.611556	15.7398	±	1.70048	18.8683	±	1.40181	6.77177	±	1.04345	12.1557	±	1.42227	11.4095	±	1.82738	21.425	±	1.89409
	11(R)-HEDE	5.95787	±	0.646236	24.5835	±	2.76968	36.5685	±	4.04044	15.0716	±	3.96095	20.0126	±	2.62744	13.511	±	1.9473	22.8271	±	2.6996
	12-HETE	1519.46	±	426.006	4916.77	±	506.854	6373.86	±	156.174	3755.52	±	852.762	4507.32	±	303.406	2702.39	±	383.927	4617.51	±	730.669
	5(S),12(S)-DiHETE	5.40738	±	0.702952	15.867	±	0.842529	24.1069	±	2.22127	16.5871	±	3.92671	23.7309	±	2.81783	13.4272	±	1.34342	26.1231	±	5.39897
	tetranor 12-HETE	4.79808	±	1.74234	11.2317	±	0.974645	13.8579	±	1.46682	17.3869	±	4.67181	9.91523	±	0.949648	7.7317	±	0.216901	7.51238	±	0.878238
	12-OxoETE	ND			ND			77.4058	±	2.47675	ND			73.8522	±	26.882	34.9464	±	14.7303	75.9787	±	34.165
	12-HEPE	554.869	±	90.349	1055.35	±	121.414	1563.34	±	290.405	679.196	±	165.968	1056.39	±	92.3614	904.918	±	134.31	1250.56	±	139.151
	14-HDoHE	222.97	±	69.406	1004.86	±	233.522	1066.34	±	61.2116	853.687	±	172.015	695.984	±	81.8511	327.866	±	32.8682	470.308	±	21.7032
	sum	2833.1	±	639.978	8060.6	±	982.849	10277.8	±	685.832	6217.13	±	1292.52	7223.59	±	594.832	5111.87	±	710.442	7881.91	±	1126.29
	Δ change	0	±	646.743	5227.5	±	1002.08	7444.67	±	685.832	3384.03	±	1311.58	4390.49	±	594.832	2278.77	±	285.321	5048.81	±	1126.29
15-LOX	13-HODE	1871.09	±	359.139	3771.05	±	457.094	4257.31	±	198.698	3936.71	±	735.196	3292.8	±	283.213	3391.65	±	130.208	4710.17	±	180.007
	13-OxoODE	431.636	±	52.7382	627.425	±	23.1142	696.947	±	81.8939	559.185	±	51.6037	582.857	±	66.0927	785.82	±	46.1593	1285.41	±	155.803
	13(S)-HOTrE	129.274	±	45.7673	204.281	±	47.8485	196.601	±	24.0797	379.786	±	86.7856	203.465	±	27.8818	192.07	±	9.1106	225.85	±	34.4688
	13(S)-HOTrE(g)	ND			ND			ND			ND			ND			ND			ND
	15(S)-HEDE	4.25045	±	1.32434	24.2308	±	6.07497	25.2133	±	1.55529	16.5636	±	4.05146	14.1976	±	2.50954	9.30594	±	1.12927	13.2053	±	0.729961
	15-OxoEDE	ND			2.81673	±	0.809395	3.76732	±	1.2425	ND			1.94045	±	0.690861	ND			4.73368	±	1.26094
	15-HETE	148.889	±	37.4144	579.581	±	81.443	662.221	±	25.7329	619.829	±	125.608	573.508	±	75.7234	318.966	±	21.0416	533.922	±	30.4294
	15-OxoETE	9.34666	±	2.46582	14.6492	±	1.86262	6.48907	±	2.4166	ND	±	ND	5.99542	±	2.16691	ND	±	ND	9.61935	±	1.91968
	8(S),15(S)-DiHETE	ND			0.667283	±	0.304886	ND			1.11125	±	0.257655	0.596191	±	0.20147	ND			ND
	5(S),15(S)-DiHETE	0.159892	±	0.0925906	0.281886	±	0.139917	ND			0.390513	±	0.10262	ND			0.158598	±	0.0484853	ND
	15(S)-HEPE	107.301	±	28.7189	318.374	±	78.8983	321.867	±	41.8255	490.541	±	113.157	296.129	±	45.1343	181.217	±	13.5875	173.439	±	21.9097
	5(S),15(S)-DiHEPE	ND			ND			0.74857	±	0.330973	0.654264	±	0.148247	0.577123	±	0.20299	ND			0.623351	±	0.229797
	17-HDoHE	34.5784	±	11.8834	146.406	±	36.3666	178.669	±	15.1883	144.852	±	28.0069	115.924	±	10.8267	52.0122	±	5.22156	69.7805	±	7.05627
	sum	2736.53	±	539.544	5689.77	±	733.956	6349.83	±	392.963	6149.62	±	1144.92	5087.99	±	514.643	4931.2	±	226.507	7026.75	±	433.814
	Δ change	0	±	539.962	2953.24	±	734.112	3613.3	±	393.352	3413.09	±	1147.62	2351.46	±	514.729	2194.67	±	91.8048	4290.22	±	434.187
Epoxygenase	9(10)-EpOME	39.1739	±	3.54914	69.5015	±	1.41902	70.4713	±	24.4695	36.317	±	13.182	52.528	±	18.216	49.9742	±	12.9873	ND
	12(13)-EpOME	19.4448	±	2.07999	32.6316	±	0.980555	46.54	±	5.35174	29.949	±	4.57582	37.364	±	2.95233	34.0012	±	2.90277	41.9112	±	3.29565
	9,10-DiHOME	18.6795	±	3.47298	14.458	±	0.785647	22.1313	±	2.32737	24.4857	±	2.26155	22.684	±	3.21207	21.8904	±	1.95012	33.2262	±	5.66985
	12,13-DiHOME	18.3517	±	2.87634	16.4224	±	1.17146	23.4821	±	2.4031	22.6726	±	1.88063	25.843	±	2.7819	22.5264	±	2.45124	41.5879	±	11.2132
	5(6)-EpETrE	2.0011	±	0.253832	4.72736	±	0.494843	6.82451	±	1.09734	2.86882	±	0.82486	4.06031	±	0.35494	2.91491	±	0.332516	5.9211	±	0.829734
	8(9)-EpETrE	ND			ND			1.06515	±	0.361776	ND			ND			0.692891	±	0.322915	1.44311	±	0.555539
	11(12)-EpETrE	3.08559	±	0.33191	7.33316	±	0.404991	12.011	±	2.11888	4.87539	±	1.22313	7.6979	±	0.866598	5.38458	±	0.616952	10.8494	±	1.32117
	14(15)-EpETrE	5.96335	±	0.960042	4.93719	±	1.54215	8.2157	±	2.13515	1.81555	±	0.819672	2.3058	±	0.842614	1.33347	±	0.645963	2.31322	±	0.920659
	5,6-DiHETrE	ND			ND			ND			ND			ND			ND			ND
	8,9-DiHETrE	ND			0.155505	±	0.0693409	0.46634	±	0.0324461	0.253668	±	0.0409304	0.205298	±	0.0721771	0.161577	±	0.0699995	0.551316	±	0.281191
	11,12-DiHETrE	1.67221	±	0.228308	2.12436	±	0.225765	3.54004	±	0.701233	2.39018	±	0.387172	3.07298	±	0.48756	2.03212	±	0.197182	4.82469	±	1.25541
	14,15-DiHETrE	3.91321	±	0.887106	4.23466	±	0.237727	7.01833	±	1.0163	4.19156	±	0.353586	6.09992	±	0.755122	3.85745	±	0.404749	8.68832	±	2.43783
	20-HETE	ND			ND			ND			ND			15.7491	±	5.46028	ND			ND
	8(9)-EpETE	ND			ND			ND			ND			ND			ND			ND
	11(12)-EpETE	ND			ND			ND			ND			ND			ND			ND
	14(15)-EpETE	ND			ND			ND			ND			ND			ND			1.86322	±	0.629178
	17(18)-EpETE	ND			0.717791	±	0.293284	1.56499	±	0.107729	0.695445	±	0.241803	1.18516	±	0.0956999	0.770284	±	0.199699	1.21596	±	0.0853319
	18-HEPE	16.2111	±	0.884296	25.3611	±	3.20714	28.857	±	1.6027	30.8725	±	3.65345	32.9173	±	1.45293	26.2025	±	2.46696	29.2852	±	3.60081
	7(8)-EpDPE	ND			0.646777	±	0.17863	1.00915	±	0.0784842	0.321628	±	0.118323	0.707095	±	0.0779079	0.703658	±	0.0969069	1.11843	±	0.141898
	10(11)-EpDPE	1.82543	±	0.324787	1.98682	±	0.211246	3.60684	±	1.17874	1.65111	±	0.260029	1.7452	±	0.339495	1.6306	±	0.662944	2.46637	±	0.354572
	13(14)-EpDPE	0.513419	±	0.172987	1.15836	±	0.507922	2.92485	±	1.11906	ND			1.86269	±	0.242579	0.908475	±	0.373193	2.75593	±	0.411785
	16(17)-EpDPE	ND			0.802225	±	0.336533	ND			ND			1.02278	±	0.143595	0.564829	±	0.245877	1.2275	±	0.434913
	19(20)-EpDPE	2.27292	±	0.295959	6.61748	±	0.891209	8.97021	±	1.27383	4.11621	±	0.712767	5.1041	±	0.39798	3.2025	±	0.317346	5.84065	±	0.452418
	sum	133.108	±	16.3177	193.816	±	12.9575	248.699	±	47.3754	167.476	±	30.5357	222.155	±	38.7518	178.752	±	27.2446	197.09	±	33.8911
	Δ change	0	±	16.7798	60.7081	±	13.243	115.591	±	47.7427	34.3682	±	31.8464	89.0464	±	33.8639	45.6438	±	10.9417	63.9815	±	57.9922
Specialized pro-resolving mediators	LXA4	0.0926235	±	0.0354842	0.411891	±	0.0398956	0.453387	±	0.13382	0.13004	±	0.0636765	0.503203	±	0.181223	0.151949	±	0.0656516	0.769801	±	0.213638
	LXA5	ND			ND			ND			ND			ND			ND			ND
	LXB4	ND			ND			ND			ND			ND			ND			ND
	15-epi LXA4	ND			ND			ND			ND			ND			ND			ND
	15-oxo LXA4	ND			ND			ND			ND			ND			ND			ND
	RvE1	ND			ND			ND			ND			ND			ND			ND
	RvE2	ND			ND			ND			ND			ND			ND			ND
	RvE3	ND			ND			ND			ND			ND			ND			ND
	RvD5(n-3DPA) (7,17-DiHDoPE)	ND			ND			ND			ND			ND			ND			ND
	PD1(n-3, DPA)	ND			ND			ND			ND			ND			ND			ND
	MaR1(n-3DPA)	1.34264	±	0.510614	ND			ND			ND			ND			1.24873	±	0.36879	ND
	RvD1 & AT-RvD1	2.50628	±	1.05598	ND			ND			ND			ND			1.71622	±	0.266733	2.98146	±	1.39313
	8-oxoRvD1	ND			ND			ND			ND			ND			ND			ND
	17-oxoRvD1	ND			ND			ND			ND			ND			ND			ND
	RvD2	ND			ND			ND			ND			ND			ND			ND
	RvD3	ND			ND			ND			ND			ND			ND			ND
	AT-RvD3	1.2459	±	0.295023	1.91096	±	0.512534	1.52941	±	0.205818	ND			0.996605	±	0.399229	ND			ND
	RvD4	ND			ND			ND			ND			ND			ND			ND
	RvD5	ND			ND			ND			ND			ND			ND			ND
	RvD6 (4,17-DiHDoHE)	0.423202	±	0.13362	0.677681	±	0.0665639	1.39719	±	0.368778	0.761841	±	0.146753	0.920146	±	0.101592	0.566283	±	0.035309	1.68714	±	0.411976
	PD1	8.83596	±	3.28036	18.4118	±	5.18117	15.6495	±	1.31347	17.1837	±	2.95457	9.75996	±	2.45661	4.72472	±	0.508888	7.45659	±	1.31466
	PDX (10S,17S-DiHDoHE)	14.9007	±	5.12072	31.9815	±	8.32214	29.9442	±	2.83611	35.0938	±	5.49609	19.5602	±	4.18724	8.99309	±	0.728518	14.1573	±	2.47687
	AT-PD1	ND			ND			ND			ND			ND			ND			ND
	22-OH-PD1	ND			ND			ND			ND			ND			ND			ND
	Maresin1	ND			ND			ND			ND			ND			ND			ND
	7(S)-Maresin1	ND			ND			ND			ND			ND			ND			ND
	sum	29.3473	±	10.4318	53.3939	±	14.1223	48.9736	±	4.858	53.1693	±	8.66109	31.7401	±	7.32589	17.401	±	1.97389	27.0523	±	5.81027
	Δ change	0	±	10.4318	24.0466	±	14.9752	19.6263	±	6.65751	23.822	±	9.82392	2.39281	±	8.24035	-11.9463	±	0.883615	-2.29498	±	7.5917
Non-enzymatic	9-HETE	ND			ND			ND			ND			ND			ND			ND
	11-HETE	153.846	±	17.3562	425.782	±	15.0943	653.945	±	31.4241	424.204	±	95.3689	459.442	±	28.6759	251.213	±	25.5929	472.378	±	63.1474
	9-HEPE	20.0861	±	3.60539	41.6121	±	7.19926	64.0229	±	10.456	23.2964	±	6.31899	37.8145	±	5.39529	36.3103	±	7.28678	53.1958	±	8.80214
	11-HEPE	19.8641	±	2.52965	35.7747	±	3.29768	46.694	±	4.85081	35.6186	±	6.72185	36.2252	±	3.53034	26.0193	±	3.37801	31.7966	±	2.17964
	8-HDoHE	8.9899	±	1.29976	22.572	±	2.19179	28.676	±	6.17042	13.0516	±	1.94399	18.6992	±	0.251392	18.3731	±	2.1844	33.6092	±	4.9665
	10-HDoHE	21.3954	±	3.70608	64.6223	±	9.44346	76.9177	±	6.76512	42.8582	±	7.70072	45.4785	±	4.31664	30.2657	±	2.56151	49.6181	±	6.01265
	11-HDoHE	8.84536	±	1.86686	ND			ND			ND			ND			16.1331	±	2.27108	28.0401	±	2.24667
	13-HDoHE	28.378	±	3.41972	71.9217	±	6.36187	105.72	±	9.57285	58.4544	±	9.68333	61.6474	±	6.22837	36.9769	±	3.47154	68.8617	±	9.23755
	16-HDoHE	28.4886	±	2.17375	52.199	±	5.73847	69.5567	±	9.15881	21.6113	±	9.84238	40.3178	±	3.12304	40.5625	±	3.83988	76.203	±	8.73931
	20-HDoHE	37.351	±	3.03905	95.0934	±	8.51291	122.096	±	18.0422	57.5001	±	5.7698	81.2402	±	6.62634	65.0648	±	5.5259	133.152	±	15.0611
	sum	327.245	±	38.9964	809.577	±	57.8398	1167.63	±	96.4403	676.595	±	143.35	780.865	±	58.1473	520.919	±	56.112	946.855	±	120.393
	Δ change	0	±	38.9964	482.332	±	65.7999	840.384	±	105.932	349.35	±	156.086	453.62	±	58.1473	193.674	±	22.5351	619.61	±	120.393
Values are mean ± SEM of 5 mice/group. ND = Below limits of detection of the assay in ≥ 50% of samples.
